# Supplementary material
Source: Springer Nature journal article supplement (https://www.springermedizin.de/resource/supplementary/12981_2006_34_MOESM1_ESM.pdf/9603682)

**A***Pre 1995*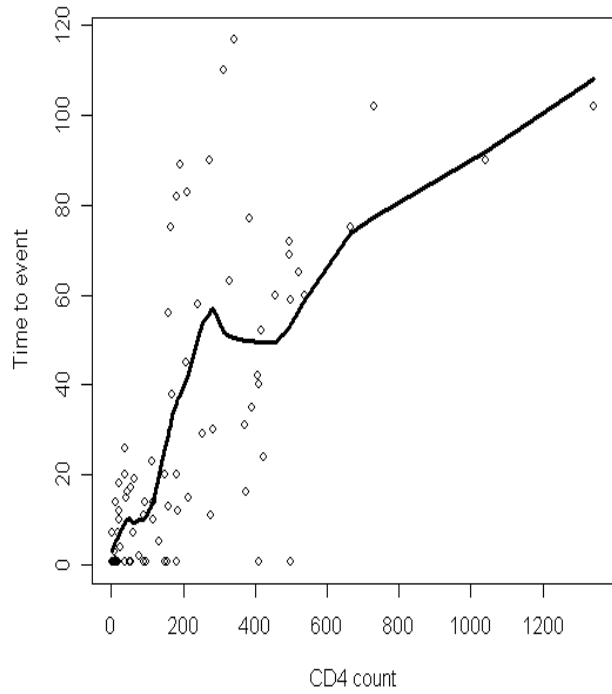**B***Pre 1995*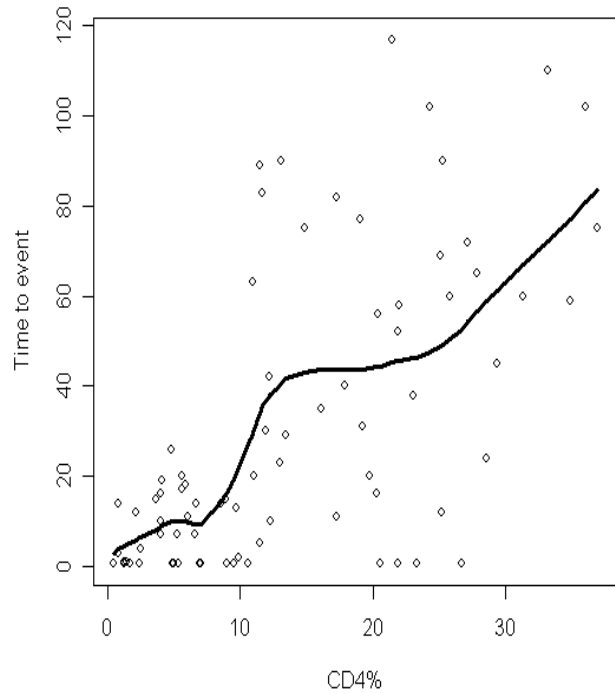**C***Post 1995*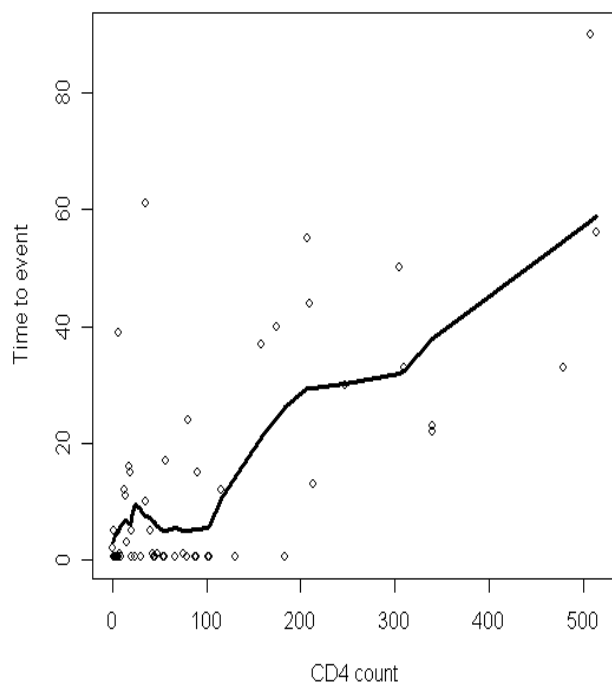**D***Post 1995*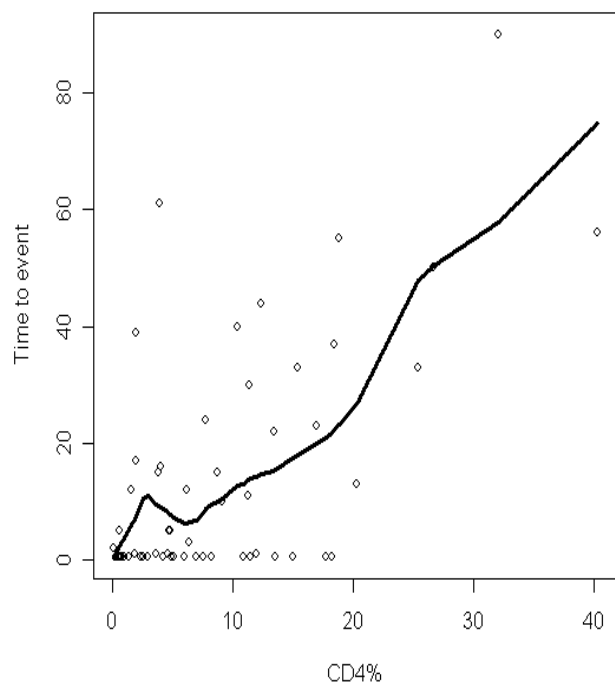

Supplement: MOESM1 [file 9603682]
